# Supplementary material
Source: HighWire-hosted journal article supplement (https://qualitysafety.bmj.com/content/28/8/609)
Supplement: inline-supplementary-material-1 [file inline-supplementary-material-1.pdf]

## SUPPLEMENTARY MATERIAL

## Included wards

| LABEL            | Description                                                          | Beds |
|------------------|----------------------------------------------------------------------|------|
| Cancer           | Medical / radiotherapy haematology / oncology                        | 40   |
| Med/Surg Cardiac | Medical / Surgical cardiac high care & step down                     | 23   |
| Med-adm          | Medical - emergency admissions                                       | 58   |
| Med-gastro       | Medical - gastro & liver                                             | 36   |
| Med-gen1         | Medical - general cardiac & gastro                                   | 36   |
| Med-gen2         | Medical - general                                                    | 30   |
| Med-gen3         | Medical - general                                                    | 35   |
| Med-OP1          | Medical - older people                                               | 30   |
| Med-OP2          | Medical - older people                                               | 20   |
| Med-OP2          | Medical - older people                                               | 29   |
| Med-OP3          | Medical - older people                                               | 30   |
| Med-OP4          | Medical - older people                                               | 21   |
| Med-renal        | Medical - renal                                                      | 24   |
| Med-renal HC     | Medical - renal high care / step down                                | 10   |
| Med-resp1        | Medical- respiratory high care and step down                         | 40   |
| Med-resp2        | Medical- respiratory                                                 | 36   |
| Med-stroke       | Medical - acute stroke                                               | 12   |
| Med-Surg         | Medical / Surgical elective & investigations                         | 13   |
| Non study        | (in regression analyses when patients spent time on non-study wards) |      |
| Rehab-neuro      | Rehabilitation - neurological (working age)                          | 13   |
| Rehab-stroke     | Rehabilitation - stroke (older people)                               | 26   |
| Surg-adm         | Surgical - admissions                                                | 28   |
| Surg-el/ortho2   | Surgical -elective orthopaedic                                       | 36   |
| Surg-em/hip#     | Surgical - fracture neck of femur / older people                     | 36   |
| Surg-em/ortho2   | Surgical - emergency orthopaedic (spinal)                            | 26   |
| Surg-em/ortho2   | Surgical - emergency orthopaedic (head injury)                       | 26   |
| Surg-gen1        | Surgical -general urology, vascular, plastic                         | 37   |
| Surg-GI          | Surgical - general, upper GI                                         | 30   |
| Surg-GI          | Surgical - general, colorectal                                       | 34   |
| Surg-gynae       | Surgical - gynaecological                                            | 22   |
| Surg-H&N         | Surgical - head & Neck                                               | 21   |
| Surg-HC          | Surgical - high care, step down / step up                            | 10   |
| Surg-renal       | Surgical - renal transplant                                          | 14   |

*Note on included wards*

We set out to study the effects of staffing on 'general' adult medical and surgical wards. Wards with specialties such as maternity care and paediatrics were excluded because staffing and patient risk profiles are fundamentally different. Our operational definition of general wards were those where staffing was determined using a common standard based on the Safer Nursing Care Tool<sup>1</sup>. Some wards that included some high dependency beds were thus included, but ICU was excluded. Patients who spent time in non-study wards were included in the study but only exposures to staffing on the included wards were considered.

## Nurse staffing, nursing assistants and hospital mortality

Supplementary table a: Nurse and care hours per patient day & skill-mix by ward

| Ward*          | days of staffing data | RN             |           |        | NA            |           |        | All care hours (RN+NA) |           |        | Skill-mix (RN/RN+NA) |           |      |
|----------------|-----------------------|----------------|-----------|--------|---------------|-----------|--------|------------------------|-----------|--------|----------------------|-----------|------|
|                |                       | establishment* | mean (SD) |        | establishment | mean (SD) |        | establishment          | mean (SD) |        | establishment        | mean (SD) |      |
| CANCER         | 1095                  | 5.49           | 5.52      | (0.64) | 2.22          | 2.25      | (0.30) | 7.71                   | 8.58      | (0.39) | 71%                  | 71%       | (3%) |
| MED/SURG       | 1095                  | 7.61           | 6.40      | (0.69) | 0.78          | 1.40      | (0.64) | 8.39                   | 7.01      | (0.89) | 91%                  | 82%       | (7%) |
| MED-ADM        | 1095                  | 7.19           | 6.92      | (1.08) | 2.32          | 2.72      | (0.58) | 9.51                   | 6.05      | (0.69) | 76%                  | 72%       | (3%) |
| MED-GASTRO     | 1095                  | 3.73           | 3.49      | (0.50) | 2.33          | 3.51      | (0.89) | 6.06                   | 7.80      | (1.27) | 62%                  | 50%       | (7%) |
| MED-GEN1       | 1095                  | 3.37           | 3.12      | (0.45) | 2.67          | 2.92      | (0.55) | 6.04                   | 7.77      | (0.74) | 56%                  | 52%       | (5%) |
| MED-GEN2       | 494                   | 3.99           | 3.18      | (0.56) | 3.17          | 3.78      | (0.72) | 7.16                   | 6.96      | (1.00) | 56%                  | 46%       | (6%) |
| MED-GEN3       | 1046                  | 3.94           | 3.43      | (0.63) | 3.36          | 2.50      | (0.59) | 7.30                   | 5.93      | (0.72) | 54%                  | 58%       | (6%) |
| MED-OP1        | 1040                  | 4.98           | 4.33      | (1.49) | 3.89          | 4.22      | (1.41) | 8.87                   | 7.35      | (1.51) | 56%                  | 51%       | (7%) |
| MED-OP2        | 197                   | 3.92           | 3.77      | (0.75) | 3.92          | 4.21      | (0.75) | 7.84                   | 7.12      | (0.88) | 50%                  | 47%       | (6%) |
| MED-OP2        | 1095                  | 3.55           | 3.64      | (0.45) | 3.29          | 3.33      | (0.48) | 6.84                   | 8.30      | (0.60) | 52%                  | 52%       | (5%) |
| MED-OP3        | 1095                  | 3.72           | 3.87      | (0.64) | 3.44          | 3.56      | (0.62) | 7.16                   | 5.98      | (0.82) | 52%                  | 52%       | (6%) |
| MED-OP4        | 864                   | 3.94           | 3.81      | (0.72) | 3.55          | 4.32      | (1.01) | 7.49                   | 6.91      | (1.51) | 53%                  | 47%       | (9%) |
| MED-RENAL      | 894                   | 8.51           | 7.30      | (1.01) | 1.39          | 1.91      | (0.56) | 9.90                   | 5.58      | (0.74) | 86%                  | 79%       | (5%) |
| MED-RENAL HC   | 1095                  | 10.76          | 9.61      | (1.54) | 3.01          | 2.59      | (0.95) | 13.77                  | 5.88      | (0.77) | 78%                  | 79%       | (7%) |
| MED-RESP1      | 854                   | 5.05           | 5.19      | (0.52) | 1.89          | 2.56      | (0.46) | 6.94                   | 7.74      | (0.66) | 73%                  | 67%       | (5%) |
| MED-RESP2      | 1095                  | 3.31           | 2.91      | (0.48) | 2.62          | 2.95      | (0.74) | 5.93                   | 5.85      | (0.91) | 56%                  | 50%       | (7%) |
| MED-STROKE     | 1027                  | 3.55           | 3.88      | (0.62) | 3.31          | 3.36      | (0.65) | 6.86                   | 8.99      | (0.86) | 52%                  | 54%       | (6%) |
| MED-SURG       | 694                   | 6.75           | 6.33      | (1.50) | 2.95          | 2.79      | (0.84) | 9.70                   | 8.55      | (0.95) | 70%                  | 70%       | (5%) |
| REHAB-NEURO    | 1044                  | 4.89           | 5.00      | (1.06) | 3.49          | 3.99      | (1.39) | 8.38                   | 7.57      | (1.31) | 58%                  | 56%       | (7%) |
| REHAB-STROKE   | 794                   | 3.86           | 3.57      | (0.53) | 3.7           | 4.00      | (0.47) | 7.56                   | 7.25      | (0.61) | 51%                  | 47%       | (5%) |
| SURG-ADM       | 1095                  | 4.1            | 3.64      | (0.75) | 1.8           | 1.96      | (0.55) | 5.90                   | 7.77      | (0.66) | 69%                  | 65%       | (7%) |
| SURG-EL/ORTHO2 | 1083                  | 4.54           | 4.06      | (1.07) | 2.36          | 3.06      | (0.72) | 6.90                   | 7.98      | (0.85) | 66%                  | 57%       | (5%) |
| SURG-EM/HIP#   | 1095                  | 4.09           | 4.36      | (0.88) | 2.62          | 3.92      | (0.99) | 6.71                   | 6.98      | (1.09) | 61%                  | 53%       | (5%) |
| SURG-EM/ORTHO2 | 1017                  | 4.35           | 4.24      | (0.87) | 3.31          | 3.53      | (0.92) | 7.66                   | 7.43      | (1.28) | 57%                  | 55%       | (7%) |
| SURG-EM/ORTHO2 | 1047                  | 4.36           | 4.04      | (0.57) | 2.79          | 3.30      | (0.68) | 7.15                   | 8.14      | (0.85) | 61%                  | 55%       | (6%) |
| SURG-GEN1      | 1095                  | 4.27           | 3.30      | (0.51) | 2.37          | 2.68      | (0.42) | 6.64                   | 9.12      | (0.52) | 64%                  | 55%       | (5%) |
| SURG-GI        | 1095                  | 3.56           | 3.39      | (0.49) | 2.56          | 2.19      | (0.34) | 6.12                   | 12.20     | (0.43) | 58%                  | 61%       | (5%) |
| SURG-GI        | 1095                  | 3.6            | 3.51      | (0.59) | 2.4           | 2.37      | (0.39) | 6.00                   | 9.22      | (0.45) | 60%                  | 60%       | (5%) |
| SURG-GYNAE     | 874                   | 4.48           | 5.71      | (1.66) | 1.74          | 2.87      | (1.01) | 6.22                   | 9.40      | (1.04) | 72%                  | 66%       | (7%) |
| SURG-H&N       | 1092                  | 5.14           | 4.68      | (0.91) | 2.48          | 2.24      | (0.77) | 7.62                   | 9.64      | (0.92) | 67%                  | 68%       | (8%) |
| SURG-HC        | 1095                  | 9.77           | 8.54      | (1.43) | 1.7           | 2.27      | (0.84) | 11.47                  | 5.59      | (1.17) | 85%                  | 79%       | (7%) |
| SURG-RENAL     | 494                   | 7.95           | 7.11      | (1.15) | 2.23          | 2.29      | (0.69) | 10.18                  | 10.81     | (0.84) | 78%                  | 76%       | (6%) |
| Mean           | 968.13                | 5.07           | 4.75      | (0.84) | 2.677         | 2.99      | (0.72) | 7.75                   | 7.73      | (0.87) | 64%                  | 60%       | (6%) |

\*See over for elaboration of ward labels

Mean RN HPPD was highly correlated with the estimated RN HPPD estimated from the planned establishment (Pearson r 0.97) with average RNHPPD 95% of the establishment level. Similarly, mean NURSING ASSISTANT staffing was closely correlated with the establishment (Pearson r 0.81) although there was more variation, with mean NURSING ASSISTANT staffing 115% of establishment. Establishments were given as staff per shift which could, in some cases, be met by a partial shift to avoid shift overlaps or by either NA or RN and so hours are estimates only. Therefore, the significance of any discrepancy is unclear. For this reason, we relied on means to indicate 'normal' staffing, derived from hours worked.

## Nurse staffing, nursing assistants and hospital mortality

Supplementary table b: Patient exposure to low staffing (n=138,133)

| <b>RN Hours per patient per day</b> | <b>Mode</b> | <b>Median</b> | <b>Mean</b> | <b>Min</b> | <b>Max</b> |
|-------------------------------------|-------------|---------------|-------------|------------|------------|
| Days below mean                     | 0           | 2             | 1.93        | 0          | 5          |
| Hours below mean                    | 0           | 0             | 0.39        | 0          | 36         |
| <b>NA Hours per patient per day</b> | <b>Mode</b> | <b>Median</b> | <b>Mean</b> | <b>Min</b> | <b>Max</b> |
| Days below mean                     | 0           | 2             | 1.94        | 0          | 5          |
| Hours below mean                    | 0           | 0             | 0.25        | 0          | 30         |

Supplementary table c: Admissions per staff member

| Ward             | days of data (N) | Mean SD |      | n(%) days 25% above mean | Mean SD |      | n(%) days 25% above mean |
|------------------|------------------|---------|------|--------------------------|---------|------|--------------------------|
| CANCER           | 1,095            | 0.78    | 0.32 | 263 (24%)                | 1.94    | 0.85 | 281 (26%)                |
| MED/SURG CARDIAC | 1,095            | 1.47    | 0.64 | 300 (27%)                | 8.59    | 6.33 | 285 (26%)                |
| MED-ADM          | 1,095            | 3.44    | 0.54 | 59 (5%)                  | 8.89    | 1.73 | 115 (11%)                |
| MED-GASTRO       | 1,095            | 1.70    | 1.01 | 272 (25%)                | 1.79    | 1.20 | 287 (26%)                |
| MED-GEN1         | 1,095            | 1.89    | 0.78 | 281 (26%)                | 2.06    | 0.91 | 280 (26%)                |
| MED-GEN2         | 494              | 1.30    | 0.76 | 143 (29%)                | 1.11    | 0.67 | 142 (29%)                |
| MED-GEN3         | 1,046            | 0.92    | 0.96 | 238 (23%)                | 1.31    | 1.50 | 233 (22%)                |
| MED-OP1          | 1,040            | 1.10    | 0.56 | 275 (26%)                | 1.16    | 0.64 | 284 (27%)                |
| MED-OP2          | 197              | 0.71    | 0.67 | 63 (32%)                 | 0.63    | 0.58 | 58 (29%)                 |
| MED-OP2          | 1,095            | 0.58    | 0.44 | 341 (31%)                | 0.65    | 0.51 | 327 (30%)                |
| MED-OP3          | 1,095            | 0.51    | 0.36 | 344 (31%)                | 0.56    | 0.40 | 352 (32%)                |
| MED-OP4          | 864              | 0.57    | 0.60 | 252 (29%)                | 0.62    | 2.90 | 198 (23%)                |
| MED-RENAL        | 894              | 0.50    | 0.29 | 273 (31%)                | 2.10    | 1.52 | 250 (28%)                |
| MED-RENAL HC     | 1,095            | 0.41    | 0.35 | 375 (34%)                | 1.75    | 1.99 | 245 (22%)                |
| MED-RESP1        | 854              | 1.19    | 0.67 | 159 (19%)                | 2.48    | 1.52 | 166 (19%)                |
| MED-RESP2        | 1,095            | 2.12    | 1.23 | 225 (21%)                | 2.16    | 1.26 | 260 (24%)                |
| MED-STROKE       | 1,027            | 0.57    | 0.45 | 303 (30%)                | 0.68    | 0.53 | 295 (29%)                |
| MED-SURG         | 694              | 1.95    | 1.06 | 204 (29%)                | 4.63    | 2.75 | 197 (28%)                |
| REHAB-NEURO      | 1,044            | 0.15    | 0.29 | 308 (30%)                | 0.20    | 0.38 | 308 (30%)                |
| REHAB-STROKE     | 794              | 0.4     | 0.50 | 259 (33%)                | 0.37    | 0.45 | 255 (32%)                |
| SURG-ADM         | 1,095            | 5.45    | 1.84 | 213 (19%)                | 10.41   | 3.83 | 236 (22%)                |
| SURG-EL/ORTHO2   | 1,083            | 2.21    | 1.46 | 413 (38%)                | 2.94    | 1.99 | 412 (38%)                |
| SURG-EM/HIP#     | 1,095            | 1.56    | 0.90 | 343 (31%)                | 1.78    | 1.05 | 349 (32%)                |
| SURG-EM/ORTHO2   | 1,017            | 0.82    | 0.60 | 318 (31%)                | 0.98    | 0.75 | 301 (30%)                |
| SURG-EM/ORTHO2   | 1,047            | 1.07    | 0.64 | 304 (29%)                | 1.34    | 0.83 | 295 (28%)                |
| SURG-GEN1        | 1,095            | 1.88    | 0.81 | 263 (24%)                | 2.30    | 0.95 | 287 (26%)                |
| SURG-GI          | 1,095            | 2.06    | 0.90 | 280 (26%)                | 3.26    | 1.55 | 286 (26%)                |
| SURG-GI          | 1,095            | 1.45    | 0.68 | 289 (26%)                | 2.18    | 1.11 | 302 (28%)                |
| SURG-GYNAE       | 874              | 2.26    | 0.94 | 225 (26%)                | 4.69    | 2.34 | 223 (26%)                |
| SURG-H&N         | 1,092            | 2.24    | 0.91 | 289 (26%)                | 5.54    | 4.25 | 249 (23%)                |
| SURG-HC          | 1,095            | 0.95    | 0.51 | 342 (31%)                | 4.06    | 3.17 | 271 (25%)                |
| SURG-RENAL       | 494              | 0.72    | 0.47 | 147 (30%)                | 2.42    | 1.82 | 129 (26%)                |
| ALL (ward)       | 968              | 1.40    | 0.72 | 261 (27%)                | 2.67    | 1.63 | 255 (26%)                |

## Nurse staffing, nursing assistants and hospital mortality

Supplementary table d: Days of staffing below the mean during the first five days: hazard of death (full model)

|                                      | Haz. Ratio | Std. Err. | p-value | 95% Confidence Interval (CI) |      |
|--------------------------------------|------------|-----------|---------|------------------------------|------|
| NEWS on admission                    | 1.24       | 0.007     | <0.001  | 1.23                         | 1.25 |
| SHMI Risk score                      | 1.82       | 0.025     | <0.001  | 1.78                         | 1.87 |
| Emergency                            | 1.11       | 0.124     | 0.365   | 0.89                         | 1.38 |
| Admissions per RN>125% of ward mean  | 1.05       | 0.023     | 0.024   | 1.01                         | 1.09 |
| Admissions per NA>125% of ward mean  | 1.00       | 0.022     | 0.873   | 0.96                         | 1.04 |
| RN staffing below ward mean          | 1.03       | 0.012     | 0.009   | 1.01                         | 1.06 |
| NA staffing below ward mean          | 1.04       | 0.012     | <0.001  | 1.02                         | 1.07 |
| Ward dummy (surg-gynae is reference) | 1.00       |           |         |                              |      |
| Med-gastro                           | 2.70       | 0.692     | <0.001  | 1.64                         | 4.47 |
| Med-gen1                             | 1.78       | 0.459     | 0.025   | 1.07                         | 2.95 |
| Med/Surg Cardiac                     | 2.17       | 0.565     | 0.003   | 1.30                         | 3.61 |
| Surg-em/ortho2                       | 0.65       | 0.190     | 0.143   | 0.37                         | 1.16 |
| Med-gen2                             | 1.13       | 0.311     | 0.656   | 0.66                         | 1.94 |
| Med-gen3                             | 0.95       | 0.257     | 0.847   | 0.56                         | 1.61 |
| Surg-em/ortho2                       | 0.83       | 0.246     | 0.528   | 0.46                         | 1.48 |
| Surg-el/ortho2                       | 0.76       | 0.369     | 0.574   | 0.29                         | 1.97 |
| Surg-em/hip#                         | 0.43       | 0.167     | 0.030   | 0.20                         | 0.92 |
| Surg-gen1                            | 1.44       | 0.388     | 0.173   | 0.85                         | 2.44 |
| Surg-H&N                             | 0.67       | 0.217     | 0.217   | 0.36                         | 1.26 |
| Surg-GI                              | 1.34       | 0.368     | 0.288   | 0.78                         | 2.29 |
| Surg-GI                              | 1.45       | 0.389     | 0.171   | 0.85                         | 2.45 |
| Med-resp1                            | 2.80       | 0.704     | <0.001  | 1.71                         | 4.59 |
| Med-resp2                            | 2.34       | 0.592     | 0.001   | 1.43                         | 3.84 |
| Rehab-neuro                          | 0.04       | 0.040     | 0.002   | 0.01                         | 0.29 |
| Med-OP1                              | 2.55       | 0.649     | <0.001  | 1.55                         | 4.20 |
| Rehab-stroke                         | 0.62       | 0.174     | 0.090   | 0.36                         | 1.08 |
| Med-stroke                           | 2.04       | 0.519     | 0.005   | 1.24                         | 3.36 |
| Cancer                               | 2.66       | 0.673     | <0.001  | 1.62                         | 4.37 |
| Med-OP2                              | 2.46       | 0.763     | 0.004   | 1.34                         | 4.52 |
| Med-OP2                              | 1.95       | 0.497     | 0.009   | 1.19                         | 3.22 |
| Med-OP3                              | 2.64       | 0.671     | <0.001  | 1.61                         | 4.35 |
| Med-OP4                              | 2.02       | 0.530     | 0.007   | 1.21                         | 3.38 |
| Med-Surg                             | 2.14       | 0.630     | 0.010   | 1.20                         | 3.81 |
| Med-renal HC                         | 1.81       | 0.514     | 0.036   | 1.04                         | 3.16 |
| Med-renal                            | 1.77       | 0.477     | 0.033   | 1.05                         | 3.01 |
| Surg-renal                           | 1.21       | 0.386     | 0.549   | 0.65                         | 2.26 |
| Med-adm                              | 1.81       | 0.456     | 0.019   | 1.10                         | 2.96 |
| Non study                            | 1.41       | 0.357     | 0.180   | 0.85                         | 2.31 |
| Surg-adm                             | 2.96       | 0.774     | <0.001  | 1.78                         | 4.95 |
| Surg-HC                              | 2.36       | 0.695     | 0.004   | 1.32                         | 4.20 |

df 41, AIC 61889.87, BIC 62376.13

## Nurse staffing, nursing assistants and hospital mortality

*Supplementary table e: Staffing below the mean during the first five days: hazard of death within 30 days*

|                                                                                                         | Haz. Ratio | Std. Err. | p-value | 95% Confidence Interval (CI) |      |
|---------------------------------------------------------------------------------------------------------|------------|-----------|---------|------------------------------|------|
| NEWS on admission                                                                                       | 1.26       | 0.007     | <0.001  | 1.24                         | 1.27 |
| SHMI Risk score                                                                                         | 1.87       | 0.027     | <0.001  | 1.81                         | 1.92 |
| Emergency                                                                                               | 1.24       | 0.158     | 0.085   | 0.97                         | 1.60 |
| Admissions per RN>125% of ward mean                                                                     | 1.05       | 0.024     | 0.044   | 1.00                         | 1.09 |
| Admissions per NA>125% of ward mean                                                                     | 1.02       | 0.023     | 0.443   | 0.97                         | 1.06 |
| RN staffing below ward mean                                                                             | 1.03       | 0.013     | 0.014   | 1.01                         | 1.06 |
| NA staffing below ward mean                                                                             | 1.04       | 0.013     | 0.001   | 1.02                         | 1.07 |
| (full model includes random effects for ward, omitted for brevity)<br>df 41, AIC 54395.58, BIC 54876.58 |            |           |         |                              |      |

*Supplementary table f: Staffing below the mean during the first five days: hazard of death within 10 days*

|                                                                                                        | Haz. Ratio | Std. Err. | p-value | 95% Confidence Interval (CI) |      |
|--------------------------------------------------------------------------------------------------------|------------|-----------|---------|------------------------------|------|
| NEWS on admission                                                                                      | 1.31       | 0.01      | 0.000   | 1.29                         | 1.33 |
| SHMI Risk score                                                                                        | 1.95       | 0.03      | 0.000   | 1.89                         | 2.02 |
| Emergency                                                                                              | 1.92       | 0.36      | 0.001   | 1.33                         | 2.78 |
| Admissions per RN>125% of ward mean                                                                    | 1.05       | 0.03      | 0.091   | 0.99                         | 1.11 |
| Admissions per NA>125% of ward mean                                                                    | 1.03       | 0.03      | 0.273   | 0.98                         | 1.09 |
| RN staffing below ward mean                                                                            | 1.05       | 0.02      | 0.003   | 1.02                         | 1.08 |
| NA staffing below ward mean                                                                            | 1.04       | 0.02      | 0.011   | 1.01                         | 1.08 |
| (full model includes random effects for ward, omitted for brevity)<br>df 41, AIC 33803.89 BIC 34271.41 |            |           |         |                              |      |

*Supplementary table g: Staffing below the mean during the first five days: hazard of death within 5 days*

|                                                                                                       | Haz. Ratio | Std. Err. | p-value | 95% Confidence Interval (CI) |      |
|-------------------------------------------------------------------------------------------------------|------------|-----------|---------|------------------------------|------|
| NEWS on admission                                                                                     | 1.35       | 0.01      | 0.000   | 1.33                         | 1.37 |
| SHMI Risk score                                                                                       | 1.96       | 0.04      | 0.000   | 1.88                         | 2.04 |
| Emergency                                                                                             | 2.60       | 0.70      | 0.000   | 1.54                         | 4.39 |
| Admissions per RN>125% of ward mean                                                                   | 1.06       | 0.04      | 0.142   | 0.98                         | 1.15 |
| Admissions per NA>125% of ward mean                                                                   | 1.04       | 0.04      | 0.279   | 0.97                         | 1.13 |
| RN staffing below ward mean                                                                           | 1.08       | 0.02      | 0.001   | 1.03                         | 1.13 |
| NA staffing below ward mean                                                                           | 1.02       | 0.02      | 0.359   | 0.98                         | 1.07 |
| (full model includes random effects for ward, omitted for brevity)<br>df 41, AIC20584.56 BIC 21038.67 |            |           |         |                              |      |

## Nurse staffing, nursing assistants and hospital mortality

*Supplementary table h: Staffing below the mean during the first five days: hazard of death – emergency admissions only*

|                                                                                                         | Haz. Ratio | Std. Err. | p-value | 95% Confidence Interval (CI) |      |
|---------------------------------------------------------------------------------------------------------|------------|-----------|---------|------------------------------|------|
| NEWS on admission                                                                                       | 1.24       | 0.007     | <0.001  | 1.23                         | 1.25 |
| SHMI Risk score                                                                                         | 1.82       | 0.025     | <0.001  | 1.77                         | 1.87 |
| Admissions per RN>125% of ward mean                                                                     | 1.05       | 0.023     | 0.019   | 1.01                         | 1.10 |
| Admissions per NA>125% of ward mean                                                                     | 1.00       | 0.022     | 0.820   | 0.95                         | 1.04 |
| RN staffing below ward mean                                                                             | 1.03       | 0.012     | 0.015   | 1.01                         | 1.05 |
| NA staffing below ward mean                                                                             | 1.04       | 0.012     | 0.001   | 1.02                         | 1.07 |
| (full model includes random effects for ward, omitted for brevity)<br>df 40, AIC 60449.97, BIC 60918.79 |            |           |         |                              |      |

*Supplementary table i: Staffing below the mean (all days of stay) – hazard of death*

|                                                                                                         | Haz. Ratio | Std. Err. | p-value | 95% Confidence Interval (CI) |      |
|---------------------------------------------------------------------------------------------------------|------------|-----------|---------|------------------------------|------|
| NEWS on admission                                                                                       | 1.25       | 0.007     | <0.001  | 1.23                         | 1.26 |
| SHMI Risk score                                                                                         | 1.85       | 0.026     | <0.001  | 1.80                         | 1.90 |
| Emergency                                                                                               | 1.13       | 0.128     | 0.278   | 0.91                         | 1.41 |
| RN staffing below ward mean                                                                             | 1.01       | 0.003     | 0.013   | 1.00                         | 1.01 |
| NA staffing below ward mean                                                                             | 1.00       | 0.003     | 0.135   | 1.00                         | 1.01 |
| (full model includes random effects for ward, omitted for brevity)<br>Df 39, AIC 61898.22, BIC 62360.76 |            |           |         |                              |      |

*Supplementary table j: Staffing below the mean during the first five days + weekend admission: hazard of death (full model)*

|                                                                                                         | Haz. Ratio | Std. Err. | p-value | 95% Confidence Interval (CI) |      |
|---------------------------------------------------------------------------------------------------------|------------|-----------|---------|------------------------------|------|
| Weekend admission                                                                                       | 1.06       | 0.035     | 0.096   | 0.99                         | 1.13 |
| NEWS on admission                                                                                       | 1.24       | 0.007     | <0.001  | 1.23                         | 1.25 |
| SHMI Risk score                                                                                         | 1.82       | 0.025     | <0.001  | 1.77                         | 1.87 |
| Emergency                                                                                               | 1.10       | 0.123     | 0.416   | 0.88                         | 1.37 |
| Admissions per RN>125% of ward mean                                                                     | 1.05       | 0.023     | 0.027   | 1.01                         | 1.09 |
| Admissions per NA>125% of ward mean                                                                     | 1.00       | 0.022     | 0.897   | 0.96                         | 1.04 |
| RN staffing below ward mean                                                                             | 1.03       | 0.012     | 0.011   | 1.01                         | 1.05 |
| NA staffing below ward mean                                                                             | 1.04       | 0.012     | <0.001  | 1.02                         | 1.07 |
| (full model includes random effects for ward, omitted for brevity)<br>df 42, AIC 61889.12, BIC 62387.23 |            |           |         |                              |      |

## Nurse staffing, nursing assistants and hospital mortality

Supplementary table k: Staffing below the mean during the first five days + weekend stay: hazard of death (full model)

|                                     | Haz. Ratio | Std. Err. | p-value | 95% Confidence Interval (CI) |      |
|-------------------------------------|------------|-----------|---------|------------------------------|------|
| Weekend stay                        | 0.58       | 0.020     | <0.001  | 0.54                         | 0.62 |
| NEWS on admission                   | 1.24       | 0.007     | <0.001  | 1.23                         | 1.25 |
| SHMI Risk score                     | 1.84       | 0.025     | <0.001  | 1.79                         | 1.89 |
| Emergency                           | 1.19       | 0.133     | 0.125   | 0.95                         | 1.48 |
| Admissions per RN>125% of ward mean | 1.03       | 0.022     | 0.152   | 0.99                         | 1.08 |
| Admissions per NA>125% of ward mean | 0.99       | 0.021     | 0.517   | 0.95                         | 1.03 |
| RN staffing below ward mean         | 1.05       | 0.013     | <0.001  | 1.03                         | 1.08 |
| NA staffing below ward mean         | 1.04       | 0.012     | <0.001  | 1.02                         | 1.07 |

(full model includes random effects for ward, omitted for brevity)  
Df 42, AIC 61656.81, BIC 62154.93

Supplementary table l SHMI admission diagnostic groups in patients who died. Patient who died who were exposed to low staffing (RN or NA, below ward mean) on first day of admission (4377) vs Patient without low staffing exposure (1480)

| SHMI Group                                                | Exposed     |       | Not exposed |       | All         |       |
|-----------------------------------------------------------|-------------|-------|-------------|-------|-------------|-------|
|                                                           | n           | %     | n           | %     | n           | %     |
| Pneumonia                                                 | 958         | 21.9% | 257         | 17.4% | 1215        | 20.7% |
| Acute cerebrovascular disease                             | 376         | 8.6%  | 120         | 8.1%  | 496         | 8.5%  |
| Congestive heart failure; nonhypertensive                 | 210         | 4.8%  | 69          | 4.7%  | 279         | 4.8%  |
| Septicaemia (except in labour); Shock                     | 191         | 4.4%  | 60          | 4.1%  | 251         | 4.3%  |
| Chronic obstructive pulmonary disease and bronchiectasis  | 129         | 3.0%  | 47          | 3.2%  | 176         | 3.0%  |
| Acute and unspecified renal failure                       | 126         | 2.9%  | 46          | 3.1%  | 172         | 2.9%  |
| Urinary tract infections                                  | 123         | 2.8%  | 37          | 2.5%  | 160         | 2.7%  |
| Acute myocardial infarction                               | 105         | 2.4%  | 46          | 3.1%  | 151         | 2.6%  |
| Cancer of bronchus; lung                                  | 98          | 2.2%  | 32          | 2.2%  | 130         | 2.2%  |
| Gastrointestinal hemorrhage                               | 93          | 2.1%  | 30          | 2.0%  | 123         | 2.1%  |
| Aspiration pneumonitis; food/vomitus                      | 85          | 1.9%  | 27          | 1.8%  | 112         | 1.9%  |
| Fracture of neck of femur (hip)                           | 69          | 1.6%  | 28          | 1.9%  | 97          | 1.7%  |
| Respiratory failure; insufficiency; arrest (adult)        | 64          | 1.5%  | 28          | 1.9%  | 92          | 1.6%  |
| Peripheral and visceral atherosclerosis                   | 70          | 1.6%  | 18          | 1.2%  | 88          | 1.5%  |
| Intestinal infection                                      | 61          | 1.4%  | 17          | 1.2%  | 78          | 1.3%  |
| Acute bronchitis                                          | 66          | 1.5%  | 9           | 0.6%  | 75          | 1.3%  |
| Secondary malignancies                                    | 44          | 1.0%  | 26          | 1.8%  | 70          | 1.2%  |
| Other gastrointestinal disorders                          | 49          | 1.1%  | 20          | 1.4%  | 69          | 1.2%  |
| Pleurisy; pneumothorax; pulmonary collapse                | 54          | 1.2%  | 12          | 0.8%  | 66          | 1.1%  |
| Other connective tissue disease                           | 39          | 0.9%  | 14          | 0.9%  | 53          | 0.9%  |
| Aortic; peripheral; and visceral artery aneurysms         | 42          | 1.0%  | 10          | 0.7%  | 52          | 0.9%  |
| Pulmonary heart disease                                   | 39          | 0.9%  | 12          | 0.8%  | 51          | 0.9%  |
| Cardiac arrest and ventricular fibrillation               | 31          | 0.7%  | 16          | 1.1%  | 47          | 0.8%  |
| Liver disease; alcohol-related                            | 35          | 0.8%  | 12          | 0.8%  | 47          | 0.8%  |
| Biliary tract disease                                     | 39          | 0.9%  | 8           | 0.5%  | 47          | 0.8%  |
| Other liver diseases                                      | 35          | 0.8%  | 10          | 0.7%  | 45          | 0.8%  |
| Mental retardation; Senility and organic mental disorders | 37          | 0.8%  | 8           | 0.5%  | 45          | 0.8%  |
| Intestinal obstruction without hernia                     | 36          | 0.8%  | 8           | 0.5%  | 44          | 0.8%  |
| Fluid and electrolyte disorders                           | 33          | 0.8%  | 10          | 0.7%  | 43          | 0.7%  |
| Superficial injury; contusion                             | 18          | 0.4%  | 20          | 1.4%  | 38          | 0.6%  |
| Hodgkin's disease; Non-Hodgkin's lymphoma                 | 24          | 0.5%  | 14          | 0.9%  | 38          | 0.6%  |
| Cancer of bone, connective tissue, thyroid or NS          | 24          | 0.5%  | 13          | 0.9%  | 37          | 0.6%  |
| Cancer of colon                                           | 28          | 0.6%  | 9           | 0.6%  | 37          | 0.6%  |
| Leukemias                                                 | 27          | 0.6%  | 9           | 0.6%  | 36          | 0.6%  |
| Skin and subcutaneous tissue infections                   | 28          | 0.6%  | 8           | 0.5%  | 36          | 0.6%  |
| Deficiency and other anemia                               | 26          | 0.6%  | 9           | 0.6%  | 35          | 0.6%  |
| Cardiac dysrhythmias                                      | 28          | 0.6%  | 7           | 0.5%  | 35          | 0.6%  |
| Intracranial injury                                       | 23          | 0.5%  | 11          | 0.7%  | 34          | 0.6%  |
| Cancer of breast                                          | 24          | 0.5%  | 10          | 0.7%  | 34          | 0.6%  |
| Cystic fibrosis; Other lower respiratory disease          | 25          | 0.6%  | 8           | 0.5%  | 33          | 0.6%  |
| Influenza & other upper respiratory infections & disease  | 20          | 0.5%  | 12          | 0.8%  | 32          | 0.5%  |
| Cancer of prostate or male genital organs                 | 22          | 0.5%  | 10          | 0.7%  | 32          | 0.5%  |
| Other fractures, sprains, strains, & joint disorders      | 13          | 0.3%  | 17          | 1.2%  | 30          | 0.5%  |
| All others (n<30)                                         | 710         | 16.2% | 286         | 19.3% | 996         | 17.0% |
| <b>Total</b>                                              | <b>4377</b> |       | <b>1480</b> |       | <b>5857</b> |       |

## Nurse staffing, nursing assistants and hospital mortality

### Staffing versus SHMI/NEWS

1. Staffing levels (RN or NA) were assigned to quartiles for each ward
2. SHMI (as raw logit) and NEWS values were extracted from the survival data for each of the first FIVE days of admission
3. Mean SHMI and NEWS values were calculated for each day on each ward
4. Three mixed-effects models were fit:
  - a) Quartile ~ SHMI.Mean + NEWS.Mean + ward(as random effect)
  - b) Above ward mean ~ SHMI.Mean + NEWS.Mean + ward(as random effect)
  - c) Deviation from ward mean ~ SHMI.Mean + NEWS.Mean + ward(as random effect)

Supplementary table m: Association between SHMI risk, First NEWS and RN staffing (Quartile)

| term                | estimate | std.error | CI Lower | CI Upper |
|---------------------|----------|-----------|----------|----------|
| (Intercept)         | 2.51     | 0.0238    | 2.46     | 2.56     |
| pas_shmi_score.mean | -0.00136 | 0.00383   | -0.00887 | 0.00615  |
| First.NEWS.mean     | -0.00688 | 0.00639   | -0.0194  | 0.00564  |

Supplementary table n: Association between SHMI risk, First NEWS and RN staffing (above mean)

| term                | estimate | std.error | p.value | CI Lower | CI Upper  |
|---------------------|----------|-----------|---------|----------|-----------|
| (Intercept)         | -0.11    | 0.0562    | 0.0492  | -0.221   | -0.000364 |
| pas_shmi_score.mean | 0.00831  | 0.0103    | 0.418   | -0.0118  | 0.0284    |
| First.NEWS.mean     | 0.000531 | 0.0133    | 0.968   | -0.0255  | 0.0265    |

Supplementary table o: Association between SHMI risk, First NEWS and RN staffing (deviation from mean)

| term                | estimate  | std.error | CI Lower | CI Upper |
|---------------------|-----------|-----------|----------|----------|
| (Intercept)         | -0.023    | 0.0184    | -0.0591  | 0.013    |
| pas_shmi_score.mean | -0.00485  | 0.00296   | -0.0107  | 0.000957 |
| First.NEWS.mean     | -0.000317 | 0.00494   | -0.01    | 0.00936  |

Supplementary table p: Association between SHMI risk, First NEWS and NA staffing (Quartile)

| term                | estimate | std.error | CI Lower | CI Upper |
|---------------------|----------|-----------|----------|----------|
| (Intercept)         | 2.51     | 0.0243    | 2.46     | 2.55     |
| pas_shmi_score.mean | -0.00309 | 0.00394   | -0.0108  | 0.00463  |
| First.NEWS.mean     | -0.00602 | 0.00647   | -0.0187  | 0.00665  |

Supplementary table q: Association between SHMI risk, First NEWS and NA staffing (above mean)

| term                | estimate | std.error | p.value | CI Lower | CI Upper |
|---------------------|----------|-----------|---------|----------|----------|
| (Intercept)         | -0.118   | 0.0628    | 0.0597  | -0.241   | 0.00483  |
| pas_shmi_score.mean | 0.00237  | 0.0114    | 0.835   | -0.0199  | 0.0247   |
| First.NEWS.mean     | -0.00166 | 0.0136    | 0.903   | -0.0283  | 0.025    |

Supplementary table r: Association between SHMI risk, First NEWS and NA staffing (deviation from mean)

| term                | estimate | std.error | CI Lower | CI Upper |
|---------------------|----------|-----------|----------|----------|
| (Intercept)         | -0.00766 | 0.0185    | -0.0439  | 0.0286   |
| pas_shmi_score.mean | -0.00427 | 0.00321   | -0.0106  | 0.00202  |
| First.NEWS.mean     | -0.00348 | 0.00453   | -0.0124  | 0.00539  |



## Nurse staffing, nursing assistants and hospital mortality

*Supplementary table s: Cumulative sum of staffing hours per patient relative to the ward mean during the first five days: hazard of death*

|                                                                                                         | Haz. Ratio | Std. Err. | p-value | 95% Confidence Interval (CI) |      |
|---------------------------------------------------------------------------------------------------------|------------|-----------|---------|------------------------------|------|
| NEWS on admission                                                                                       | 1.24       | 0.007     | <0.001  | 1.22                         | 1.25 |
| SHMI Risk score                                                                                         | 1.82       | 0.024     | <0.001  | 1.77                         | 1.87 |
| Emergency                                                                                               | 1.15       | 0.128     | 0.222   | 0.92                         | 1.43 |
| Admissions per RN>125% of ward mean                                                                     | 1.06       | 0.022     | 0.003   | 1.02                         | 1.11 |
| Admissions per NA>125% of ward mean                                                                     | 1.02       | 0.020     | 0.238   | 0.98                         | 1.06 |
| RN Hours                                                                                                | 0.97       | 0.013     | 0.023   | 0.94                         | 1.00 |
| NA Hours                                                                                                | 1.01       | 0.015     | 0.394   | 0.98                         | 1.04 |
| (full model includes random effects for ward, omitted for brevity)<br>Df 41, AIC 61919.40, BIC 62405.66 |            |           |         |                              |      |

*Supplementary table t: Cumulative sum of staffing hours per patient below the mean during the first five days: hazard of death*

|                                                                                                         | Haz. Ratio | Std. Err. | p-value | 95% Confidence Interval (CI) |      |
|---------------------------------------------------------------------------------------------------------|------------|-----------|---------|------------------------------|------|
| NEWS on admission                                                                                       | 1.24       | 0.007     | <0.001  | 1.22                         | 1.25 |
| SHMI Risk score                                                                                         | 1.82       | 0.024     | <0.001  | 1.77                         | 1.87 |
| Emergency                                                                                               | 1.15       | 0.128     | 0.220   | 0.92                         | 1.43 |
| Admissions per RN>125% of ward mean                                                                     | 1.05       | 0.021     | 0.008   | 1.01                         | 1.10 |
| Admissions per NA>125% of ward mean                                                                     | 1.03       | 0.019     | 0.091   | 0.99                         | 1.07 |
| RN Hours below ward mean (cum sum)                                                                      | 1.03       | 0.016     | 0.046   | 1.00                         | 1.06 |
| NA Hours below ward mean (cum sum)                                                                      | 1.00       | 0.018     | 0.849   | 0.97                         | 1.04 |
| (full model includes random effects for ward, omitted for brevity)<br>Df 41, AIC 61920.08, BIC 62406.33 |            |           |         |                              |      |

*Supplementary table u: Cumulative sum of staffing hours per patient relative to the mean during the first five days: hazard of death including quadratic and cubic terms*

|                                                                                                         | Haz. Ratio | Std. Err. | p-value | 95% Confidence Interval (CI) |      |
|---------------------------------------------------------------------------------------------------------|------------|-----------|---------|------------------------------|------|
| NEWS on admission                                                                                       | 1.24       | 0.007     | <0.001  | 1.22                         | 1.25 |
| SHMI Risk score                                                                                         | 1.82       | 0.024     | <0.001  | 1.77                         | 1.87 |
| Emergency                                                                                               | 1.15       | 0.128     | 0.216   | 0.92                         | 1.43 |
| Admissions per RN>125% of ward mean                                                                     | 1.06       | 0.022     | 0.004   | 1.02                         | 1.10 |
| Admissions per NA>125% of ward mean                                                                     | 1.02       | 0.020     | 0.265   | 0.98                         | 1.06 |
| RN Hours                                                                                                | 0.98       | 0.015     | 0.200   | 0.95                         | 1.01 |
| RN Hours <sup>2</sup>                                                                                   | 1.00       | 0.003     | 0.621   | 0.99                         | 1.01 |
| RN Hours <sup>3</sup>                                                                                   | 1.00       | <0.001    | 0.930   | 1.00                         | 1.00 |
| NA Hours                                                                                                | 1.00       | 0.020     | 0.835   | 0.97                         | 1.04 |
| NA Hours <sup>2</sup>                                                                                   | 1.01       | 0.004     | 0.014   | 1.00                         | 1.02 |
| NA Hours <sup>3</sup>                                                                                   | 1.00       | 0.001     | 0.061   | 1.00                         | 1.00 |
| (full model includes random effects for ward, omitted for brevity)<br>Df 45, AIC 61920.19, BIC 62453.88 |            |           |         |                              |      |

## Nurse staffing, nursing assistants and hospital mortality

*Supplementary table v: Hazard of death associated with cumulative hours above or below mean during the first five days (with RN X NA interaction)*

|                                                                    | Haz. Ratio | Std. Err. | p-value | 95% Confidence Interval (CI) |      |
|--------------------------------------------------------------------|------------|-----------|---------|------------------------------|------|
| NEWS on admission                                                  | 1.24       | 0.007     | <0.001  | 1.22                         | 1.25 |
| SHMI Risk score                                                    | 1.82       | 0.024     | <0.001  | 1.77                         | 1.87 |
| Emergency                                                          | 1.15       | 0.128     | 0.222   | 0.92                         | 1.43 |
| Admissions per RN>125% of ward mean                                | 1.06       | 0.022     | 0.003   | 1.02                         | 1.11 |
| Admissions per NA>125% of ward mean                                | 1.02       | 0.020     | 0.241   | 0.98                         | 1.06 |
| RN Hours                                                           | 0.97       | 0.014     | 0.048   | 0.94                         | 1.00 |
| NA Hours                                                           | 1.01       | 0.015     | 0.362   | 0.98                         | 1.04 |
| RN X NA Interaction                                                | 1.00       | 0.004     | 0.699   | 0.99                         | 1.01 |
| (full model includes random effects for ward, omitted for brevity) |            |           |         |                              |      |

### Seasonal Linear model (figures a,b)

Mixed-effects linear model of staffing ~ month + year + ward(as random effect). Plot shows fixed-effects coefficients for each month (June Mo 6 is reference month)

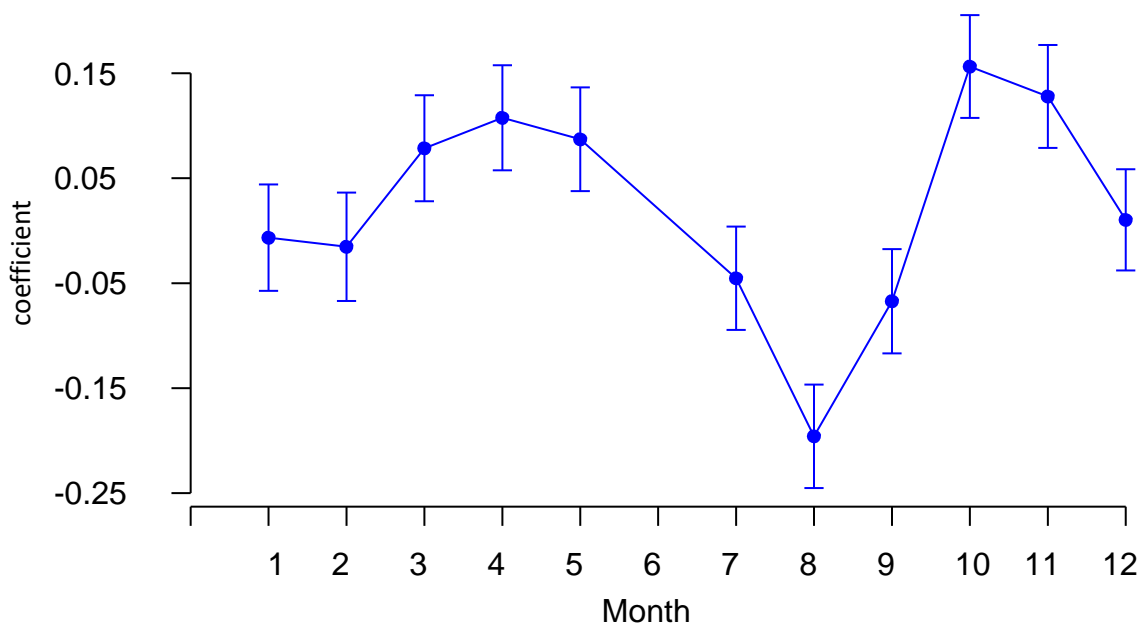

Supplementary figure a: Seasonal variation in RN staffing

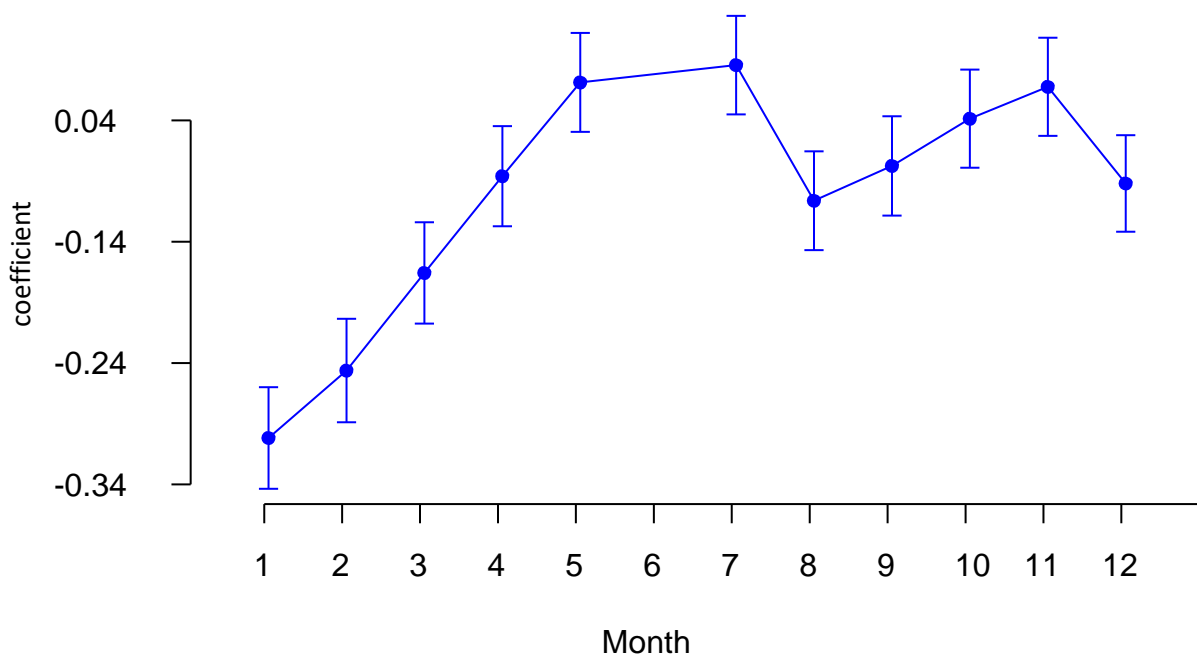

Supplementary figure b: Seasonal variation in NA staffing

1. The Shelford group. Safer Nursing Care Tool Implementation Resource Pack: The Shelford Group, 2014.
